# Supplementary material
Source: publisher figshare collection journal article supplement (https://frontiersin.figshare.com/ndownloader/files/25544957)
Supplement: Supplementary file 1 [file 25544957]

## Supplementary Material

### Supplementary Figures and Tables

**Supplementary Figure 1.** Photographs of benthic communities found on turbid coral reefs in southern Singapore. (a) Coral communities on the reef crest of Pulau Hantu that comprise high coral cover, but relatively low structural complexity. A SedPod, which allows for sediment resuspension by currents, is deployed on the reef crest to measure net sediment accumulation rates on reefs; (b) coral communities on the reef crest (2–3 m depth) of Kusu Island which are dominated by massive (e.g. *Porites* sp.) corals and other stress-tolerant taxa (e.g. *Goniopora* sp.); (c) foliose/platy coral on the fore-reef slope at Pulau Hantu (~5 m depth) showing evidence of sediment deposition and partial mortality on the colony surface; (d) sponge and gorgonian communities on the reef slope of Kusu Island (~9 m depth), below the euphotic depth, where benthic cover is predominately fine mud and rubble, and non-autotrophic reef taxa.

**Supplementary Figure 2.** Long-term changes (27 years) in coral cover (%) between 1986 and 2012 at Pulau Hantu and Kusu Island, Singapore (data modified from Guest et al, 2016). Data are plotted for: (a) the shallow reef crest (3 m depth), and (b) the deeper reef slope (7 m depth).

**Supplementary Table 1.** Turbidity percentile values (SSC;  $\text{mg l}^{-1}$ ) for the 100<sup>th</sup> (maximum), 99<sup>th</sup>, 95<sup>th</sup>, 80<sup>th</sup>, 50<sup>th</sup> (median) percentiles and mean derived from running mean time periods (1 hour, 1 day, 3 days, 7 days, 12/14 days) for Kusu Island and Pulau Hantu in southern Singapore.

**Supplementary Table 2.** Daily light integral ( $\text{mol photons m}^{-2} \text{d}^{-1}$ ) for the 50<sup>th</sup> (median), 20<sup>th</sup>, 5<sup>th</sup> percentiles and mean derived from running mean time periods (1, 3, 7, 12/14 days) for Kusu Island and Pulau Hantu in southern Singapore.

**Supplementary Table 3.** Current velocity percentile values ( $\text{cm sec}^{-1}$ ) for the 100<sup>th</sup> (maximum), 99<sup>th</sup>, 95<sup>th</sup>, 80<sup>th</sup>, 50<sup>th</sup> (median) percentiles and mean derived from running mean time periods (1 hour, 1, 3, 7, 14 days) for both reef crest (2–3 m depth) and reef slope (7 m depth) zones on Kusu Island and Pulau Hantu in southern Singapore.

**Supplementary Table 4.** Summary of gross and net sedimentation accumulation rates ( $\text{mg cm}^{-2} \text{d}^{-1}$ ) and sediment characteristics collected using tube trap (gross) and SedPods (net) deployed on the reef crest (2–3 m depth) and reef slope (7 m depth) of Kusu Island and Pulau Hantu, southern Singapore. Sediment characteristics of benthic sediment collected from the reef surface are also shown.

**Supplementary Table 5.** The proportion (%) of reef current velocities ( $\text{cm s}^{-1}$ ) recorded over the deployment period at reef crest (2–3 m depth) and reef slope (7 m depth) of Kusu Island and Pulau Hantu, southern Singapore.

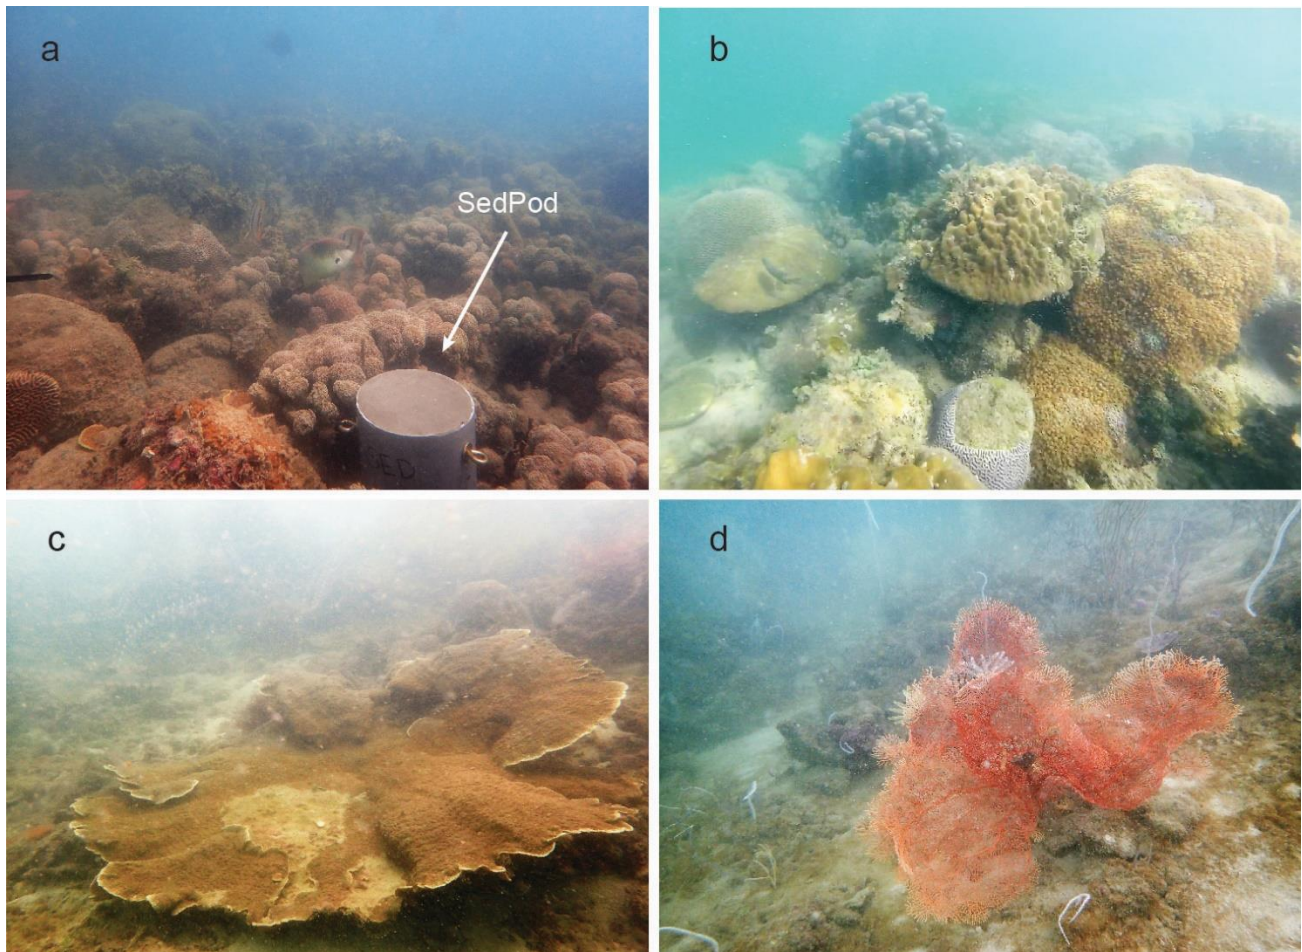

**Supplementary Figure 1.** Photographs of benthic communities found on turbid coral reefs in southern Singapore. (a) Coral communities on the reef crest of Pulau Hantu that comprise high coral cover, but relatively low structural complexity. A SedPod, which allows for sediment resuspension by currents, is deployed on the reef crest to measure net sediment accumulation rates on reefs; (b) coral communities on the reef crest (2–3 m depth) of Kusu Island which are dominated by massive (e.g. *Porites* sp.) corals and other stress-tolerant taxa (e.g. *Goniopora* sp.); (c) foliose/platy coral on the fore-reef slope at Pulau Hantu (~5 m depth) showing evidence of sediment deposition and partial mortality on the colony surface; (d) sponge and gorgonian communities on the reef slope of Kusu Island (~9 m depth), below the euphotic depth, where benthic cover is predominately fine mud and rubble, and non-autotrophic reef taxa.

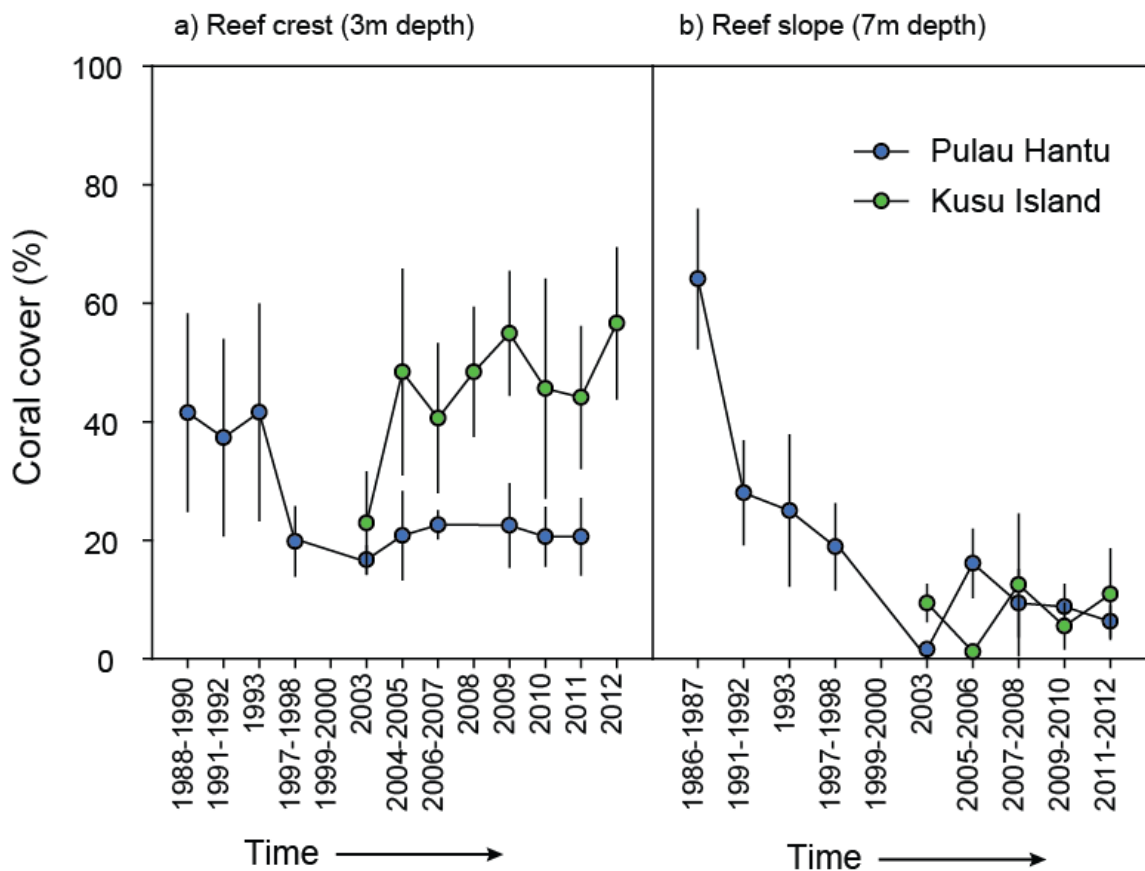

**Supplementary Figure 2.** Long-term changes (27 years) in coral cover (%) between 1986 and 2012 at Pulau Hantu and Kusu Island, Singapore (data modified from Guest et al, 2016). Data are plotted for: (a) the shallow reef crest (3 m depth), and (b) the deeper reef slope (7 m depth).

Guest, J. R., Tun, K., Low, J., Vergés, A., Marzinelli, E. M., Campbell, A. H., ... & Steinberg, P. D. (2016). 27 years of benthic and coral community dynamics on turbid, highly urbanised reefs off Singapore. *Scientific reports*, 6, 36260.

**Supplementary Table 1.** Turbidity percentile values (SSC; mg l<sup>-1</sup>) for the 100<sup>th</sup> (maximum), 99<sup>th</sup>, 95<sup>th</sup>, 80<sup>th</sup>, 50<sup>th</sup> (median) percentiles and mean derived from running mean time periods (1 hour, 1 day, 3 days, 7 days, 12/14 days) for Kusu Island and Pulau Hantu in southern Singapore.

| SSC (mg l <sup>-1</sup> ) |         | P100  | P99   | P95   | P80  | P50  | mean |
|---------------------------|---------|-------|-------|-------|------|------|------|
| Kusu Island               |         |       |       |       |      |      |      |
|                           | 1 hour  | 107.9 | 90.0  | 61.0  | 23.7 | 7.9  | 15.7 |
|                           | 1 day   | 74.0  | 73.1  | 59.2  | 19.8 | 8.9  | 14.9 |
|                           | 3 days  | 39.6  | 39.5  | 38.6  | 22.5 | 9.3  | 14.0 |
|                           | 7 days  | 21.4  | 21.4  | 20.9  | 19.6 | 13.6 | 13.2 |
|                           | 14 days | 19.3  | 18.8  | 16.9  | 15.5 | 13.7 | 11.6 |
| Pulau Hantu               |         |       |       |       |      |      |      |
|                           | 1 hour  | 221.3 | 197.1 | 127.9 | 73.5 | 26.4 | 42.5 |
|                           | 1 day   | 141.4 | 140.1 | 118.1 | 75.3 | 25.0 | 41.1 |
|                           | 3 days  | 100.5 | 99.1  | 92.6  | 72.5 | 26.0 | 40.5 |
|                           | 7 days  | 99.7  | 98.6  | 92.3  | 72.5 | 25.9 | 40.5 |
|                           | 12 days | 63.8  | 63.7  | 63.6  | 60.1 | 42.4 | 41.3 |

**Supplementary Table 2.** Daily light integral (mol photons m<sup>-2</sup> d<sup>-1</sup>) for the 50<sup>th</sup> (median), 20<sup>th</sup>, 5<sup>th</sup> percentiles and mean derived from running mean time periods (1, 3, 7, 12/14 days) for Kusu Island and Pulau Hantu in southern Singapore.

| <b>Daily light integral<br/>(mol photons m<sup>-2</sup> d<sup>-1</sup>)</b> |         | P50  | P20  | P5   | mean |
|-----------------------------------------------------------------------------|---------|------|------|------|------|
| Kusu Island                                                                 |         |      |      |      |      |
|                                                                             | 1 day   | 13.8 | 9.1  | 3.8  | 13.9 |
|                                                                             | 3 days  | 13.9 | 11.1 | 5.0  | 14.2 |
|                                                                             | 7 days  | 14.0 | 11.7 | 10.2 | 14.7 |
|                                                                             | 14 days | 14.5 | 14.1 | 13.9 | 15.7 |
| Pulau Hantu                                                                 |         |      |      |      |      |
|                                                                             | 1 day   | 5.9  | 4.0  | 2.3  | 6.4  |
|                                                                             | 3 days  | 6.7  | 4.7  | 3.7  | 6.5  |
|                                                                             | 7 days  | 6.2  | 5.8  | 5.0  | 6.4  |
|                                                                             | 12 days | 6.5  | 5.9  | 5.0  | 6.6  |

**Supplementary Table 3.** Current velocity percentile values ( $\text{cm sec}^{-1}$ ) for the 100<sup>th</sup> (maximum), 99<sup>th</sup>, 95<sup>th</sup>, 80<sup>th</sup>, 50<sup>th</sup> (median) percentiles and mean derived from running mean time periods (1 hour, 1, 3, 7, 14 days) for both reef crest (2–3 m depth) and reef slope (7 m depth) zones on Kusu Island and Pulau Hantu in southern Singapore.

| Current velocity<br>( $\text{cm sec}^{-1}$ ) |         | P100  | P99   | P95  | P80  | P50  | mean |
|----------------------------------------------|---------|-------|-------|------|------|------|------|
| Kusu Island (reef crest)                     |         |       |       |      |      |      |      |
|                                              | 1 hour  | 25.1  | 15.8  | 12.0 | 8.7  | 6.8  | 7.2  |
|                                              | 1 day   | 9.3   | 9.1   | 8.7  | 8.2  | 7.3  | 7.2  |
|                                              | 3 days  | 8.8   | 8.7   | 8.5  | 8.1  | 7.3  | 7.2  |
|                                              | 7 days  | 8.8   | 8.7   | 8.5  | 8.1  | 7.3  | 7.2  |
|                                              | 14 days | 8.3   | 8.3   | 8.2  | 7.9  | 7.3  | 7.1  |
| Kusu Island (reef slope)                     |         |       |       |      |      |      |      |
|                                              | 1 hour  | 29.4  | 17.1  | 10.1 | 4.8  | 2.8  | 3.8  |
|                                              | 1 day   | 7.2   | 6.8   | 6.1  | 5.0  | 3.6  | 3.8  |
|                                              | 3 days  | 6.5   | 6.3   | 6.0  | 4.9  | 3.6  | 3.8  |
|                                              | 7 days  | 6.5   | 6.2   | 6.0  | 4.9  | 3.6  | 3.8  |
|                                              | 14 days | 5.6   | 5.6   | 5.5  | 4.8  | 3.7  | 3.8  |
| Pulau Hantu (reef crest)                     |         |       |       |      |      |      |      |
|                                              | 1 hour  | 57.2  | 42.0  | 35.7 | 18.9 | 5.2  | 10.2 |
|                                              | 1 day   | 39.0  | 37.8  | 15.4 | 12.5 | 9.8  | 10.1 |
|                                              | 3 days  | 22.0  | 21.9  | 20.6 | 12.8 | 9.7  | 10.1 |
|                                              | 7 days  | 21.8  | 21.7  | 20.4 | 12.7 | 9.7  | 10.1 |
|                                              | 14 days | 17.3  | 17.2  | 16.6 | 12.3 | 9.8  | 10.2 |
| Pulau Hantu (reef slope)                     |         |       |       |      |      |      |      |
|                                              | 1 hour  | 114.2 | 107.4 | 46.7 | 19.4 | 5.0  | 12.7 |
|                                              | 1 day   | 25.0  | 24.5  | 23.7 | 17.2 | 12.0 | 12.7 |
|                                              | 3 days  | 24.6  | 23.8  | 22.8 | 16.2 | 12.4 | 12.7 |
|                                              | 7 days  | 24.4  | 23.7  | 22.6 | 16.3 | 12.5 | 12.7 |
|                                              | 14 days | 21.8  | 21.5  | 21.0 | 15.8 | 12.4 | 13.0 |

**Supplementary Table 4.** Summary of gross and net sedimentation accumulation rates ( $\text{mg cm}^{-2} \text{d}^{-1}$ ) and sediment characteristics collected using tube trap (gross) and SedPods (net) deployed on the reef crest (2–3 m depth) and reef slope (7 m depth) of Kusu Island and Pulau Hantu, southern Singapore. Sediment characteristics of benthic sediment collected from the reef surface are also shown.

|                                                                  | Kusu Island    |                | Pulau Hantu   |                |
|------------------------------------------------------------------|----------------|----------------|---------------|----------------|
|                                                                  | Reef crest     | Reef slope     | Reef crest    | Reef slope     |
| <b>Tube traps</b>                                                |                |                |               |                |
| Sediment accumulation rate ( $\text{mg cm}^{-2} \text{d}^{-1}$ ) | $18.2 \pm 4.2$ | $22.9 \pm 0.3$ | $9.8 \pm 0.9$ | $17.1 \pm 0.8$ |
| Mean grain size ( $\mu\text{m}$ )                                | 6.2            | 7.7            | 8.8           | 8.1            |
| Mean settling velocity ( $\text{cm s}^{-1}$ )                    | 0.000          | 0.001          | 0.001         | 0.001          |
| % gravel                                                         | 0%             | 0%             | 0%            | 0%             |
| % sand                                                           | 4%             | 5%             | 8%            | 14%            |
| % mud                                                            | 96%            | 95%            | 92%           | 86%            |
| Total organic carbon (%)                                         | 15%            | 13%            | 14%           | 13%            |
| Total inorganic carbon (%)                                       | 3%             | 3%             | 2%            | 6%             |
| Non-reef sediment (%)                                            | 83%            | 84%            | 84%           | 80%            |
| <b>SedPods</b>                                                   |                |                |               |                |
| Sediment accumulation rate ( $\text{mg cm}^{-2} \text{d}^{-1}$ ) | 0.0            | 1.2            | 0.1           | 0.7            |
| Mean grain size ( $\mu\text{m}$ )                                | 1.91           | 15.5           | 12.2          | 9.51           |
| Mean settling velocity ( $\text{cm s}^{-1}$ )                    | 0.000          | 0.025          | 0.016         | 0.011          |
| % gravel                                                         | 0%             | 0%             | 0%            | 0%             |
| % sand                                                           | 17%            | 19%            | 20%           | 17%            |
| % mud                                                            | 83%            | 81%            | 80%           | 83%            |
| Total organic carbon (%)                                         | 12%            | 13%            | 13%           | 13%            |
| Total inorganic carbon (%)                                       | 9%             | 8%             | 7%            | 9%             |
| Non-reef sediment (%)                                            | 81%            | 78%            | 79%           | 77%            |
| <b>Benthic sediment</b>                                          |                |                |               |                |
| Mean grain size ( $\mu\text{m}$ )                                | 1093           | 314            | 524           | 183            |
| Mean settling velocity ( $\text{cm s}^{-1}$ )                    | 17.04          | 4.81           | 8.30          | 2.26           |
| Sorting ( $\sigma$ )                                             | 2.1            | 3.5            | 2.8           | 3.0            |
| % gravel                                                         | 27%            | 12%            | 16%           | 8%             |
| % sand                                                           | 71%            | 58%            | 77%           | 43%            |
| % mud                                                            | 1%             | 29%            | 7%            | 48%            |
| Total organic carbon (%)                                         | 5%             | 9%             | 4%            | 13%            |
| Total inorganic carbon (%)                                       | 24%            | 22%            | 37%           | 29%            |
| Non-reef sediment (%)                                            | 71%            | 69%            | 59%           | 59%            |

**Supplementary Table 5.** The proportion (%) of reef current velocities ( $\text{cm s}^{-1}$ ) recorded over the deployment period at reef crest (2–3 m depth) and reef slope (7 m depth) of Kusu Island and Pulau Hantu, southern Singapore.

| Current velocity<br>( $\text{cm s}^{-1}$ ) | Kusu Island |            | Pulau Hantu |            |
|--------------------------------------------|-------------|------------|-------------|------------|
|                                            | Reef crest  | Reef slope | Reef crest  | Reef slope |
| 0-5                                        | 80.3        | 22.9       | 50.2        | 48.9       |
| 5-10                                       | 13.5        | 63.7       | 16.3        | 19.0       |
| 10-15                                      | 3.4         | 10.4       | 7.2         | 7.7        |
| 15-20                                      | 1.4         | 2.2        | 6.6         | 6.1        |
| 20-25                                      | 0.8         | 0.6        | 5.1         | 4.6        |
| 25-30                                      | 0.4         | 0.2        | 4.5         | 4.3        |
| 30-35                                      | 0.1         | 0.0        | 2.6         | 2.9        |
| 35-40                                      | 0.1         | 0.0        | 1.5         | 1.5        |
| 40-45                                      | 0.0         | 0.0        | 0.8         | 3.6        |
| 45-50                                      | 0.0         | 0.0        | 0.7         | 0.7        |
| 50-55                                      | 0.0         | 0.0        | 0.5         | 0.2        |
| 55-60                                      | 0.0         | 0.0        | 0.4         | 0.2        |
| 60-65                                      | 0.0         | 0.0        | 0.4         | 0.0        |
| 65-70                                      | 0.0         | 0.0        | 0.3         | 0.0        |
| >70                                        | 0.0         | 0.0        | 2.8         | 0.1        |
